# Supplementary material
Source: publisher site journal article supplement (https://www.dovepress.com/article/325980)
Supplement: Supplementary file 1 [file get_supplementary_file.php]

**
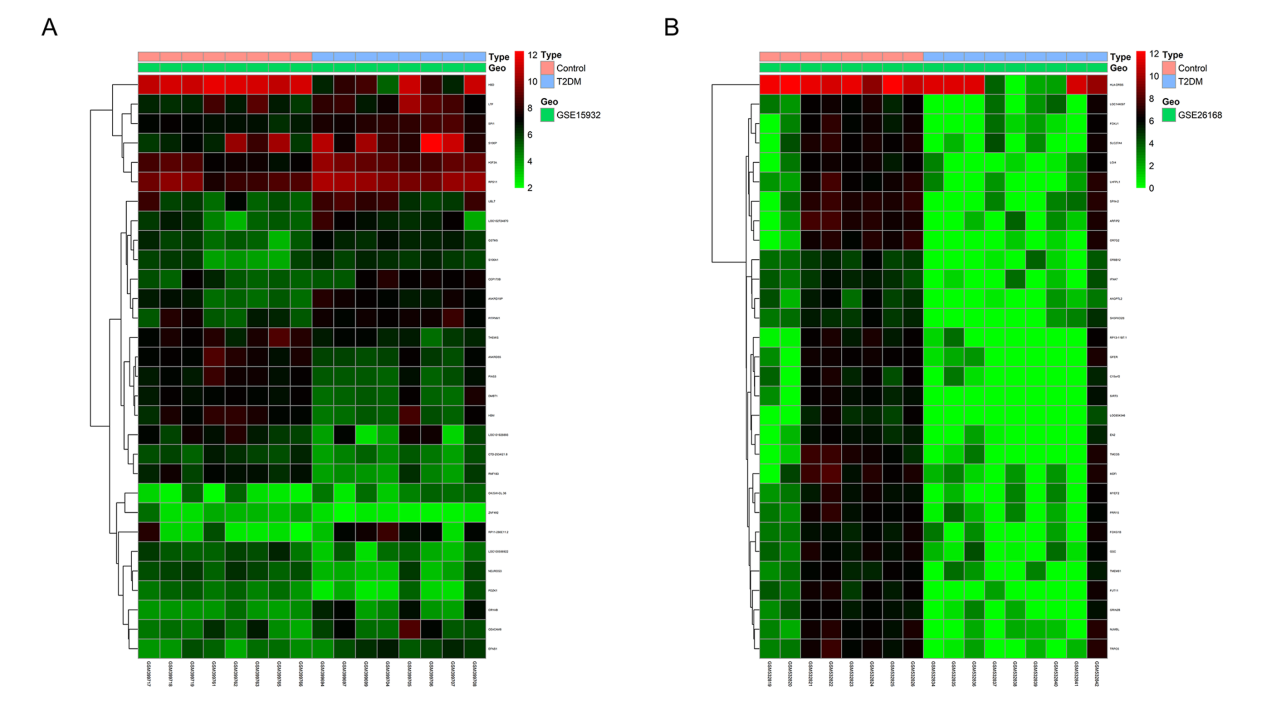
**

**Supplement Figure 1.** Heat map of (A). GSE15932; (B). GSE26168 showing the DEGs with largest fold change in type 2 diabetes mellitus (T2DM) compared with controls. Red represents greater expression and green represents less expression.


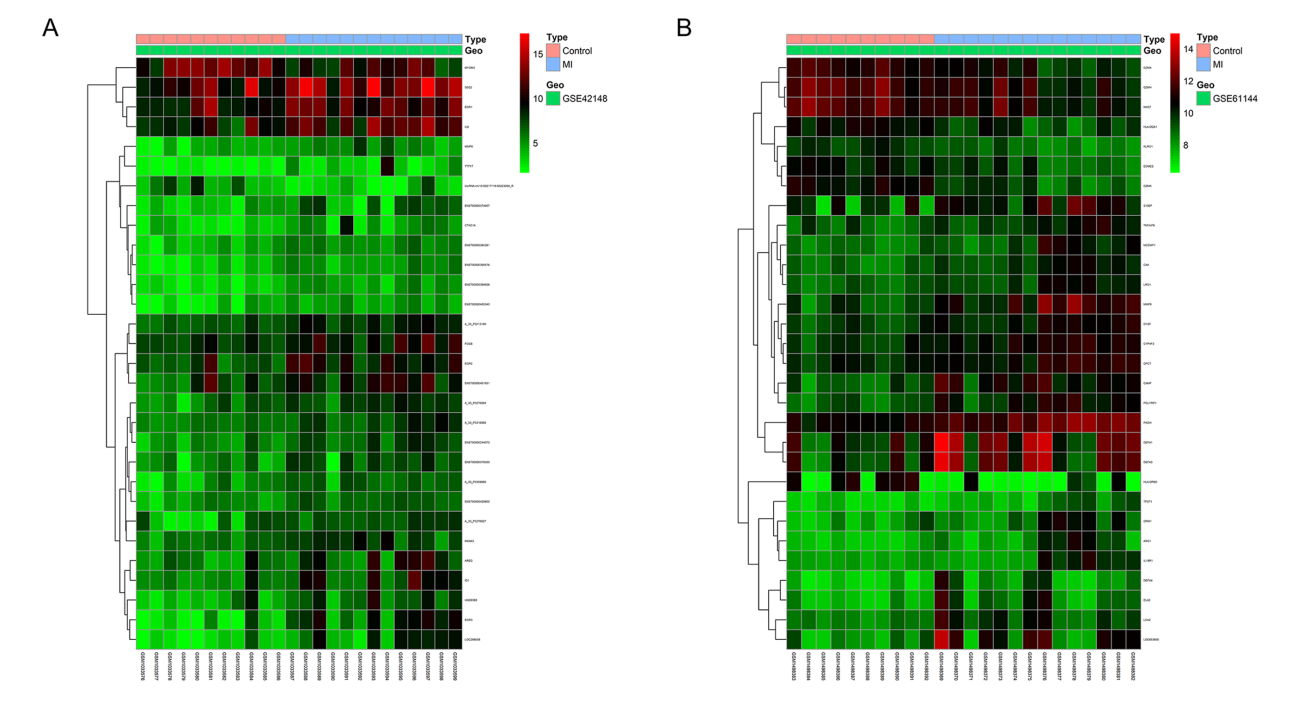


**Supplement Figure 2**. Heat map of (A). GSE42148; (B). GSE61144 showing the DEGs with largest fold change in myocardial infarction (MI) compared with controls. Red represents greater expression and green represents less expression.

**Appendix 1. Relative R codes to identify differentially expressed genes (DEGs)**

#source("http://bioconductor.org/biocLite.R")

#biocLite("limma")

logFoldChange=0

adjustP=0.05

library(limma)

rt=read.table("geneMatrix.txt",sep="\t",header=T,check.names=F)

rt=as.matrix(rt)

rownames(rt)=rt[,1]

exp=rt[,2:ncol(rt)]

dimnames=list(rownames(exp),colnames(exp))

rt=matrix(as.numeric(as.matrix(exp)),nrow=nrow(exp),dimnames=dimnames)

rt[rt < 0] <- 0

#differential

modType=c(rep("con",8),rep("T2DM",8))

design <- model.matrix(~0+factor(modType))

colnames(design) <- c("con","T2DM")

fit <- lmFit(rt,design)

cont.matrix<-makeContrasts(T2DM-con,levels=design)

fit2 <- contrasts.fit(fit, cont.matrix)

fit2 <- eBayes(fit2)

allDiff=topTable(fit2,adjust='fdr',number=200000)

write.table(allDiff,file="limmaTab.xls",sep="\t",quote=F,row.names=T)

#write table

diffSig <- allDiff[with(allDiff, (abs(logFC)>logFoldChange & adj.P.Val < adjustP )), ]

write.table(diffSig,file="diff.xls",sep="\t",quote=F,row.names=T)

diffUp <- allDiff[with(allDiff, (logFC>logFoldChange & adj.P.Val < adjustP )), ]

write.table(diffUp,file="up.xls",sep="\t",quote=F,row.names=T)

diffDown <- allDiff[with(allDiff, (logFC<(-logFoldChange) & adj.P.Val < adjustP )), ]

write.table(diffDown,file="down.xls",sep="\t",quote=F,row.names=T)

#write expression level of diff gene

#hmExp=rt[as.vector(diffSig[,1]),]

hmExp=rt[as.vector(colnames(diffSig)),]

diffExp=rbind(id=colnames(hmExp),hmExp)

write.table(diffExp,file="diffExp.txt",sep="\t",quote=F,col.names=F)

#volcano

pdf(file="vol.pdf")

xMax=max(-log10(allDiff$adj.P.Val))

yMax=max(abs(allDiff$logFC))

plot(-log10(allDiff$adj.P.Val), allDiff$logFC, xlab="-log10(adj.P.Val)",ylab="logFC",

main="Volcano", xlim=c(0,xMax),ylim=c(-yMax,yMax),yaxs="i",pch=20, cex=0.8)

diffSub=subset(allDiff, adj.P.Val<adjustP & logFC>logFoldChange)

points(-log10(diffSub$adj.P.Val), diffSub$logFC, pch=20, col="red",cex=0.8)

diffSub=subset(allDiff, adj.P.Val<adjustP & logFC<(-logFoldChange))

points(-log10(diffSub$adj.P.Val), diffSub$logFC, pch=20, col="green",cex=0.8)

abline(h=0,lty=2,lwd=3)

dev.off()

**Supplement Table 1. Gene list of DEGs**

| T2DM-DEGs | | | MI-DEGs | | | co-DEGs | |
| --- | --- | --- | --- | --- | --- | --- | --- |
| Up-regulated | Down-regulated | Up-regulated | | Down-regulated | Up-regulated | | Down-regulated |
| BCL2L1 | RNF183 | RAB1A | | MS4A7 | STAT3 | | SLC1A7 |
| FAM122C | UAP1 | TSPAN14 | | HLA-DPA1 | UBAP1 | | MRPL35 |
| THAP7 | PIGW | LOC652191 | | RARRES3 | RRAGD | | UBP1 |
| PQBP1 | PTPN4 | BNIP3L | | SH2D1A | PDZD3 | | SLC4A7 |
| GPR6 | GSTZ1 | C15orf39 | | GZMM | PECAM1 | |  |
| NR6A1 | ZNF660 | MAPKAPK2 | | CCL5 | PHC2 | |  |
| TMCC2 | ERRFI1 | WDR26 | | ADA | GAB2 | |  |
| SOX1 | CDC7 | AKT1 | | RPS28 | ROPN1L | |  |
| NARFL | JAKMIP1 | TMBIM4 | | CRIP1 | TLE3 | |  |
| KLF16 | B3GALT2 | MAP3K11 | | ZNF683 | AZU1 | |  |
| BICC1 | OR51B6 | TPR | | PTPRCAP | GRK6 | |  |
| TMEM92 | RRN3 | C14orf159 | | C9orf142 | ASF1B | |  |
| SLC2A5 | BTAF1 | FCGRT | | PLEKHF1 | MPO | |  |
| PIWIL4 | HACE1 | NUMB | | GIMAP7 | CAMP | |  |
| MYH8 | UNG | PLEKHM1 | | NDUFB2 | FCGRT | |  |
| CDH4 | MRPS30 | C16orf57 | | LFNG | MMP9 | |  |
| IPPK | ABCE1 | RAB5A | | WDR54 | DEFA4 | |  |
| COPZ2 | CCL8 | SNX10 | | NDUFS8 | LTF | |  |
| HMGB2 | CAND1 | CIC | | SH2D2A |  | |  |
| SH3GL1 | ZFP3 | ATP6V0B | | RPS20 |  | |  |
| DNMBP | ABCB10 | TM6SF1 | | GZMB |  | |  |
| CDC34 | PEG10 | IFNAR2 | | IMP3 |  | |  |
| TOR2A | PIGK | CDKN2D | | GIMAP5 |  | |  |
| PSMD4 | ZNF600 | FAM48A | | CX3CR1 |  | |  |
| PGD | ELOVL4 | BCKDK | | LPXN |  | |  |
| HMG20B | TGDS | DBN1 | | ICAM2 |  | |  |
| RDM1 | ZDHHC23 | BIN3 | | SSR4 |  | |  |
| LOC284379 | DLAT | AKAP8L | | MDH1 |  | |  |
| MYOZ3 | ZNF431 | PRKAR1A | | SH2D1B |  | |  |
| NDST1 | FABP5 | NSFL1C | | SEPW1 |  | |  |
| MCTP2 | ADH5 | C10orf12 | | ADRB2 |  | |  |
| MDH1B | KBTBD8 | ADAM8 | | GPR171 |  | |  |
| PFN4 | FNBP1L | EPS15L1 | | LAX1 |  | |  |
| PRRG3 | ZFP90 | CUGBP2 | | GPR18 |  | |  |
| DEFB118 | ZWINT | RNF13 | | ENPP4 |  | |  |
| ZNF215 | ACADM | ARSG | | DENND2D |  | |  |
| HSF1 | ZNF558 | PHKA2 | | STK39 |  | |  |
| GRIP2 | TRAM1L1 | ERGIC1 | | RASGRP1 |  | |  |
| TMUB2 | FAM98B | LRRC25 | | BOLA3 |  | |  |
| SSH1 | ZFP37 | MFN2 | | MRPL15 |  | |  |
| AQP2 | LDOC1L | MNT | | RPP21 |  | |  |
| CCNA1 | ABCC10 | ELL | | CDKN1C |  | |  |
| KCNK7 | ANKRD32 | DDX3X | | PTGDS |  | |  |
| GBF1 | MLLT3 | TPCN2 | | FASLG |  | |  |
| MPDU1 | SULT1E1 | ASF1B | | GPBAR1 |  | |  |
| WNK2 | DCUN1D4 | MAP1LC3A | | RNF125 |  | |  |
| PTGIR | GFM1 | DHRSX | | RRM1 |  | |  |
| STAT3 | AGL | MEF2B | | MT1F |  | |  |
| NEUROD6 | PSMA5 | BRD4 | | LSM2 |  | |  |
| TREM2 | WWP1 | ERO1L | | SFRS7 |  | |  |
| WIPI2 | ZNF680 | MLF2 | | C8orf59 |  | |  |
| RAB11B | SLC1A7 | RAB43 | | MGMT |  | |  |
| CREG1 | CXCR3 | LRRFIP1 | | CDK4 |  | |  |
| PIK3CD | ATP10D | PXK | | DDX1 |  | |  |
| SMOX | FUBP1 | PDLIM7 | | ABI3 |  | |  |
| CORO1C | MRPL35 | SLC6A6 | | CYP2R1 |  | |  |
| UBAP1 | NUP107 | SELL | | CRIP2 |  | |  |
| TRAK1 | STAMBPL1 | C14orf1 | | REXO2 |  | |  |
| DHX34 | TMEM19 | RANBP9 | | BBS2 |  | |  |
| VRK3 | DDX46 | LILRB3 | | SLAMF1 |  | |  |
| UBE2H | CAPN2 | CSF3R | | NDUFS7 |  | |  |
| RUFY2 | UBP1 | KDR | | SARS |  | |  |
| RTN3 | E2F6 | FLOT2 | | PTGDR |  | |  |
| ST14 | SPATA5 | IMPDH1 | | C14orf80 |  | |  |
| PCDHGA3 | ZNF620 | ST3GAL2 | | NDUFA8 |  | |  |
| HMBS | ZNF532 | SLC16A5 | | HSPH1 |  | |  |
| GDF2 | RNMT | DGAT1 | | SLC1A7 |  | |  |
| TNFSF13 | FAM24B | FNDC3B | | SPIB |  | |  |
| RRAGD | SETD6 | KIAA1539 | | MIS12 |  | |  |
| ARRDC1 | SETDB2 | LRPAP1 | | GSPT2 |  | |  |
| OTOP2 | ZNF26 | SLC15A3 | | C21orf33 |  | |  |
| PDZD3 | TOMM70A | ABCC5 | | UBP1 |  | |  |
| SPTLC2 | ZNF22 | CCPG1 | | PTPLAD1 |  | |  |
| WDR13 | SLC4A7 | MAEA | | MRPL17 |  | |  |
| LRRC43 | SS18L1 | TGFBR1 | | ID3 |  | |  |
| ARSJ | KCTD9 | AMICA1 | | ZFP161 |  | |  |
| PECAM1 | CUL5 | PPM1F | | PRPF19 |  | |  |
| C1orf111 | CDC23 | CAP1 | | ATP5F1 |  | |  |
| HSF2BP | CD47 | ITPK1 | | GOT1 |  | |  |
| AGPAT2 | GOLPH3L | KLHL12 | | KIFAP3 |  | |  |
| GABRA1 | ALG6 | TBXAS1 | | AKR7A2 |  | |  |
| UBE2O | ARSE | LASP1 | | C12orf29 |  | |  |
| AGPAT1 | YWHAG | TMEM127 | | MRPL13 |  | |  |
| SYT13 | GFPT1 | NIN | | YIF1A |  | |  |
| GABRA5 | SPRR2G | LPPR2 | | MRPL50 |  | |  |
| AKT1S1 | CCDC43 | CSNK1D | | GPR68 |  | |  |
| HIST1H2AC | UBE2NL | FMNL1 | | CCDC76 |  | |  |
| RAPGEF3 | MDC1 | TMCC3 | | ALG8 |  | |  |
| DMRTB1 | IRS1 | JDP2 | | SLC20A1 |  | |  |
| UBN1 | SMEK2 | UBAP1 | | VGLL4 |  | |  |
| PHC2 | DCBLD1 | MAST3 | | TRUB2 |  | |  |
| CCDC3 | LTV1 | MGRN1 | | MRPL36 |  | |  |
| ARID4B | ARMC9 | RNF169 | | RHOU |  | |  |
| LIMK2 | CREBL2 | STAT3 | | KIAA1826 |  | |  |
| MPP1 | VAMP4 | MAPK3 | | NDUFA6 |  | |  |
| IL31RA | BIRC6 | SVIL | | HEATR1 |  | |  |
| OGDH | NEB | RPS6KA5 | | PAQR8 |  | |  |
| TP53I11 | RBM3 | MSRA | | GRWD1 |  | |  |
| NXPH4 | ZBTB3 | ICA1 | | RPA3 |  | |  |
| EMILIN3 | EPM2AIP1 | TMEM71 | | ZNF593 |  | |  |
| SLC2A11 | CRBN | PROK2 | | DCI |  | |  |
| FRMPD1 | RBM15 | ARHGAP9 | | C2orf7 |  | |  |
| VIM | ANKRD23 | SLC19A1 | | ZC3HC1 |  | |  |
| ENG | NDUFB8 | RERE | | HAX1 |  | |  |
| MAPKAP1 | ARHGEF6 | GADD45A | | COX5B |  | |  |
| RHD | DLG1 | PLCB2 | | GNGT2 |  | |  |
| RAB1B | TRIP11 | AQP9 | | DYRK2 |  | |  |
| DEFB125 | POLR1C | MBD6 | | PURA |  | |  |
| STYXL1 | VPS36 | SLC44A2 | | RUSC1 |  | |  |
| PINK1 | CPNE9 | NFYA | | CHCHD8 |  | |  |
| HSPBP1 | MTCH2 | DENND3 | | C19orf12 |  | |  |
| TGFB1 | OAF | GSN | | C21orf45 |  | |  |
| EHD1 | HRASLS2 | PPP3CA | | DTYMK |  | |  |
| UBTD1 | KATNAL1 | LIN7A | | SMARCAD1 |  | |  |
| MKNK2 | RPS29 | TNFAIP2 | | RRAS2 |  | |  |
| TBC1D22A | PCM1 | ETF1 | | CD40LG |  | |  |
| TBL2 | SLC30A7 | TESK2 | | MTERFD1 |  | |  |
| GAB2 | CFI | CLEC4E | | SIGIRR |  | |  |
| SKAP2 | SMARCE1 | ROPN1L | | PTCD1 |  | |  |
| ECE1 | ZMPSTE24 | PHF2 | | MCEE |  | |  |
| RFC2 | SPA17 | PACSIN2 | | SLC4A7 |  | |  |
| MID1IP1 | SMURF2 | CFLAR | | ABHD6 |  | |  |
| ROPN1L | UBE3A | PECAM1 | | C20orf4 |  | |  |
| RAB5C | DYNC2H1 | MKNK1 | | FAM96B |  | |  |
| BCL7B | ZNF706 | MMP25 | | ANKRD13C |  | |  |
| TGFB1I1 | RPS6KB1 | TMEM50A | | PPAT |  | |  |
| SRY | CSTF1 | QKI | | TARBP2 |  | |  |
| C10orf95 |  | SAMD4B | | APOA1BP |  | |  |
| CHGA |  | NPL | | C6orf125 |  | |  |
| KCTD2 |  | RDH5 | | C19orf24 |  | |  |
| SPRR2B |  | ANXA11 | | DBT |  | |  |
| AADACL2 |  | CEBPB | | ST6GALNAC6 |  | |  |
| SPRR3 |  | ADPGK | | RIOK2 |  | |  |
| FCGR2A |  | SRXN1 | | CHCHD4 |  | |  |
| MARK2 |  | PTEN | | ZNF562 |  | |  |
| SLC39A1 |  | PAN3 | | TDP1 |  | |  |
| SELPLG |  | EIF4G3 | | DCXR |  | |  |
| DYRK3 |  | ZFAND3 | | ZNF17 |  | |  |
| TLE3 |  | PLD1 | | ZBTB9 |  | |  |
| ALPL |  | TLR2 | | NVL |  | |  |
| ATP4B |  | CDC42SE1 | | ZNF540 |  | |  |
| GPR27 |  | MYO9B | | TRAPPC4 |  | |  |
| ASGR2 |  | CUEDC1 | | PPP2R2B |  | |  |
| FOXM1 |  | UPB1 | | COQ5 |  | |  |
| HTATIP2 |  | RGL2 | | UBE2D4 |  | |  |
| FAM9C |  | STEAP4 | | ANKRD46 |  | |  |
| ACTN1 |  | MIDN | | MRPL39 |  | |  |
| USF2 |  | MYBPC3 | | MTSS1 |  | |  |
| SH3BP2 |  | ZNFX1 | | SNX4 |  | |  |
| HIST1H2BO |  | RRAGD | | LIN9 |  | |  |
| CPNE6 |  | TRPM6 | | CSE1L |  | |  |
| GRB2 |  | TLR8 | | HDDC3 |  | |  |
| FRAT1 |  | INPP5A | | SNAPC3 |  | |  |
| SLC29A4 |  | MPZL1 | | TEX10 |  | |  |
| TMEM54 |  | GMEB2 | | ZNF69 |  | |  |
| FRMPD4 |  | KIAA0556 | | CDK2AP2 |  | |  |
| CCM2 |  | SYF2 | | MAP4K5 |  | |  |
| AZU1 |  | MMP9 | | RNGTT |  | |  |
| CKAP4 |  | STRN | | GEMIN6 |  | |  |
| GRK6 |  | TMEM88 | | ZBTB24 |  | |  |
| RASGRP4 |  | PELI1 | | ZNF259 |  | |  |
| KRT18 |  | NOTCH1 | | EIF2B2 |  | |  |
| FUT7 |  | GPSM2 | | ALG3 |  | |  |
| WASF2 |  | IRAK3 | | PMVK |  | |  |
| TKT |  | EIF2C4 | | PCBD1 |  | |  |
| SIAH2 |  | COQ10B | | RNASEH2A |  | |  |
| LSP1 |  | PHC2 | | LCMT2 |  | |  |
| ITGA2B |  | GRK6 | | MED19 |  | |  |
| CD82 |  | NFIL3 | | TRIM65 |  | |  |
| ECSIT |  | DUSP16 | | KIF22 |  | |  |
| ASF1B |  | MSRB3 | | PECI |  | |  |
| LAMB3 |  | STK17B | | TP53RK |  | |  |
| TMEFF2 |  | WDFY3 | | ATAD1 |  | |  |
| SH3BP5L |  | SLC39A7 | | MTMR2 |  | |  |
| NCF4 |  | GABARAPL1 | | NOC3L |  | |  |
| KCNAB3 |  | ZBED1 | | C8orf30A |  | |  |
| MAF1 |  | PCBP3 | | FNTA |  | |  |
| MGAT4B |  | DDIT3 | | HSPD1 |  | |  |
| HECA |  | IL13RA1 | | HDHD2 |  | |  |
| HIST2H2BE |  | TREM1 | | KMO |  | |  |
| ARRB2 |  | ZXDC | | C18orf55 |  | |  |
| EIF1 |  | ZNF516 | | FAM113A |  | |  |
| GRN |  | IDS | | C1orf35 |  | |  |
| S100A12 |  | CHPT1 | | SLC25A12 |  | |  |
| PAX2 |  | GAB2 | | SLAMF8 |  | |  |
| PRDX5 |  | SCPEP1 | | TMEM50B |  | |  |
| MPO |  | FKBP5 | | ZNRD1 |  | |  |
| TXN |  | HCG27 | | CBR1 |  | |  |
| ABTB1 |  | ZDHHC18 | | PAQR3 |  | |  |
| CA14 |  | C14orf138 | | WASL |  | |  |
| CAMP |  | PPP4R1 | | CPOX |  | |  |
| CA4 |  | SLC9A8 | | MRPS14 |  | |  |
| SIGLEC5 |  | OGFRL1 | | DHX36 |  | |  |
| GPR97 |  | TLE3 | | POLR3K |  | |  |
| MCL1 |  | MPPE1 | | KIAA1279 |  | |  |
| LILRA2 |  | CAMKK2 | | ZNF236 |  | |  |
| BCAS3 |  | PIM3 | | PAG1 |  | |  |
| CHMP2A |  | PBX2 | | SIT1 |  | |  |
| RAB32 |  | DAPK2 | | C7orf36 |  | |  |
| CEBPA |  | FAM101B | | MRPL35 |  | |  |
| PHOSPHO1 |  | CAMK1D | | SIP1 |  | |  |
| MCEMP1 |  | PROC | | PHF19 |  | |  |
| FCGRT |  | HSD17B13 | | ZNF264 |  | |  |
| MMP9 |  | CAMP | | BYSL |  | |  |
| CTSD |  | CSF2RA | | GOSR2 |  | |  |
| ARID5A |  | SLC2A3 | | NUDT8 |  | |  |
| GJA10 |  | SSH3 | | ZNF614 |  | |  |
| DEFA4 |  | IVNS1ABP | | THNSL1 |  | |  |
| CEACAM8 |  | CBX4 | | HYLS1 |  | |  |
| LTF |  | RCN3 | | MORG1 |  | |  |
|  |  | ATG16L2 | | C1orf31 |  | |  |
|  |  | CITED4 | | GPAM |  | |  |
|  |  | ZFP36 | | APEX2 |  | |  |
|  |  | CLEC7A | | MRPL27 |  | |  |
|  |  | SLC45A4 | | NKRF |  | |  |
|  |  | TPST1 | | ZNF239 |  | |  |
|  |  | ZNF281 | | TRAF5 |  | |  |
|  |  | C3orf62 | | ZNF616 |  | |  |
|  |  | LMTK2 | | PPAPDC2 |  | |  |
|  |  | SIRPB1 | | SOCS4 |  | |  |
|  |  | NEDD9 | | MRPS12 |  | |  |
|  |  | IMPA2 | | PDRG1 |  | |  |
|  |  | TAGAP | | SLC25A17 |  | |  |
|  |  | KLF7 | | QSER1 |  | |  |
|  |  | MGAM | | CXorf40B |  | |  |
|  |  | CYP4F12 | | C18orf1 |  | |  |
|  |  | ABHD2 | | ZNF202 |  | |  |
|  |  | RNF166 | | HOXB4 |  | |  |
|  |  | ACPP | | FAM50B |  | |  |
|  |  | TGM3 | | RAP2B |  | |  |
|  |  | FAM7A1 | | TCF12 |  | |  |
|  |  | TNFRSF12A | | RAD50 |  | |  |
|  |  | DUSP1 | | GAS1 |  | |  |
|  |  | PLAUR | | EBF2 |  | |  |
|  |  | SLC11A1 | | THAP7 |  | |  |
|  |  | CLEC5A | | COL10A1 |  | |  |
|  |  | ORM2 | | TAF1A |  | |  |
|  |  | HIP1 | | RHEBL1 |  | |  |
|  |  | IL1R2 | | POP1 |  | |  |
|  |  | AZU1 | | SYT17 |  | |  |
|  |  | VNN3 | | TUBG1 |  | |  |
|  |  | CXCL6 | | RET |  | |  |
|  |  | MPO | |  |  | |  |
|  |  | ORM1 | |  |  | |  |
|  |  | CILP | |  |  | |  |
|  |  | BPI | |  |  | |  |
|  |  | ABCA13 | |  |  | |  |
|  |  | KIF13A | |  |  | |  |
|  |  | ARG1 | |  |  | |  |
|  |  | IRS2 | |  |  | |  |
|  |  | TRIB1 | |  |  | |  |
|  |  | RAPGEFL1 | |  |  | |  |
|  |  | LTF | |  |  | |  |
|  |  | PDZD3 | |  |  | |  |
|  |  | DEFA4 | |  |  | |  |
|  |  | USP32 | |  |  | |  |
|  |  | COL17A1 | |  |  | |  |
|  |  | TP53INP2 | |  |  | |  |
|  |  | FCAR | |  |  | |  |
|  |  | CEACAM6 | |  |  | |  |
|  |  | OLR1 | |  |  | |  |
|  |  | PTGS2 | |  |  | |  |
|  |  | CXCL1 | |  |  | |  |
|  |  | MMP8 | |  |  | |  |

DEGs, differentially expressed genes; T2DM, type 2 diabetes mellitus; MI, myocardial infarction.
